# Supplementary material for: Exhalative Breath Markers Do Not Offer for Diagnosis of Interstitial Lung Diseases: Data from the European IPF Registry (eurIPFreg) and Biobank
Source: MDPI journal article supplement (doi:10.3390/jcm8050643), 2019-05-09
Supplement: s1 [file s1]

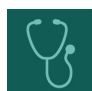

**Supplementary Table S1.** Demographics, clinical and lung function parameters in ILD subgroups (apart from IPF), FeNO measurements.

|                         | uILD<br>n = 2    | RB-ILD<br>n = 2  | COP<br>n = 8           | HP<br>n = 5           | Sarcoidosis<br>n = 3 | CTD-ILD<br>n = 3   | Pooled analysis,<br>p-value | Test             |
|-------------------------|------------------|------------------|------------------------|-----------------------|----------------------|--------------------|-----------------------------|------------------|
| Age                     | 75 (69-81)       | 39 (34-43)       | 71 (65-76)             | 69 (50-74)            | 50 (42-68)           | 62 (44-67)         | 0.1026                      | KW               |
| Gender (♀/♂)            | 2/0              | 2/0              | 2/6                    | 2/3                   | 0/3                  | 2/1                | 0.0977                      | Chi <sup>2</sup> |
| Active smoker, n (%)    | 0 (0)            | 2 (100)          | 0 (0)                  | 0 (0)                 | 0 (0)                | 0 (0)              |                             |                  |
| Never smoked, n (%)     | 2 (100)          | 0 (0)            | 3 (38)                 | 2 (40)                | 1 (33)               | 0 (0)              | 0.0014                      | Chi <sup>2</sup> |
| Ex-smoker, n (%)        | 0 (0)            | 0 (0)            | 5 (63)                 | 3 (60)                | 2 (67)               | 3 (100)            |                             |                  |
| CRP (mg/dl)             | 1.8 (0.3-3.3)    | 0.95 (0.7-1.2)   | 0.35 (0.23-2.03)       | 0.5 (0.15-2.75)       | 0.8 (0.3-1.2)        | 0.1 (0-22.6)       | 0.9348                      | KW               |
| BAL: (ml)               | 70 (55-85)       | 80, n: 1         | 68 (56-72)             | 73 (65-84), n: 4      | 60 (55-65)           | 73 (73-73), n: 2   | 0.3243                      | MWU              |
| Macrophages %           | 50 (45-55)       | 93, n: 1         | 78 (62-89)             | 51 (17-76), n: 4      | 72 (45-72)           | 71 (57-85), n: 2   | 0.2726                      | MWU              |
| Neutrophils %           | 20 (2-37)        | 6, n: 1          | 4 (1-9)                | 4 (2-7), n: 4         | 11 (4-13)            | 20 (10-30), n: 2   | 0.3619                      | MWU              |
| Eosinophils %           | 7.5 (7-8)        | 0, n: 1          | 1.5 (0-3.8)            | 2 (0.5-5.8), n: 4     | 0 (0-1)              | 1 (0-2), n: 2      | 0.2202                      | MWU              |
| Lymphocytes %           | 23 (11-35)       | 1, n: 1          | 13 (6-26)              | 39 (18-79), n: 4      | 24 (16-42)           | 8 (3-13), n: 2     | 0.1631                      | MWU              |
| CD4/CD8 ratio           | 5.8, n: 1        |                  | 1.65 (0.45-3.85), n: 6 | 1.9 (0.65-2.63), n: 4 | 1.8 (1.8-7.5)        | 50, n: 1           | 0.2890                      | MWU              |
| VC % pred.              | 62 (40-83)       | 64 (35-92)       | 87 (64-103)            | 61 (38-97)            | 71 (63-96)           | 74 (55-108)        | 0.8230                      | KW               |
| FVC % pred.             | 67 (42-92)       | 61 (31-90)       | 83 (48-104)            | 65 (42-100)           | 83 (71-97)           | 83 (67-112)        | 0.8450                      | KW               |
| TLC % pred.             | 72 (63-80)       | 84 (64-104)      | 83 (65-98)             | 78 (44-95)            | 64 (58-102)          | 62 (49-114)        | 0.9376                      | KW               |
| FEV1 % pred.            | 81 (52-109)      | 57 (29-84)       | 91 (58-104)            | 82 (50-113)           | 82 (80-111)          | 103 (80-110)       | 0.8677                      | KW               |
| FEV1/VC % pred.         | 135 (134-136)    | 89 (84-93)       | 108 (97-115)           | 129 (104-131)         | 115 (112-124)        | 136 (108-153)      | 0.0348                      | KW               |
| ITGV % pred.            | 85 (84-86)       | 108 (96-119)     | 91 (65-132)            | 88 (46-105)           | 87 (66-92)           | 108 (48-127)       | 0.7328                      | KW               |
| RV % pred.              | 95 (89-100)      | 127 (124-129)    | 88 (58-113)            | 72 (49-129)           | 49 (49-120)          | 80 (10-134)        | 0.6192                      | KW               |
| RV/TLC % pred.          | 133 (108-157)    | 140 (122-158)    | 104 (69-122)           | 113 (87-138)          | 79 (70-110)          | 113 (18-122)       | 0.3513                      | KW               |
| R tot kPa × s/l         | 0.33 (0.31-0.34) | 0.19 (0.11-0.26) | 0.33 (0.25-0.48)       | 0.41 (0.27-0.69)      | 0.37 (0.23-0.42)     | 0.34 (0.28-0.45)   | 0.5887                      | KW               |
| DLCO % pred.            | 37 (17-57)       | 65 (49-81)       | 61 (33-73), n: 3       | 43 (28-68)            | 74 (61-89)           | 53.5 (41-66), n: 2 | 0.3518                      | KW               |
| KCO % pred.             | 65, n: 1         | 79.5 (66-93)     | 66 (35-94), n: 3       | 65 (46-86)            | 92.5 (67-118), n: 2  | 81 (67-95), n: 2   | 0.4987                      | KW               |
| SaO <sub>2</sub> in %   | 93.5 (91-96)     | 96.5 (96-97)     | 95.5 (92.5-96.75)      | 96 (94.5-97.5)        | 97 (96-98)           | 96 (95-97)         | 0.4846                      | KW               |
| pO <sub>2</sub> (mmHg)  | 68.5 (56-81)     | 88.5 (87-90)     | 75 (65.25-83.5)        | 82 (72.5-90.5)        | 84 (79-89)           | 86 (74-91)         | 0.3282                      | KW               |
| pCO <sub>2</sub> (mmHg) | 36.5 (36-37)     | 41 (39-43)       | 39 (38.25-41.75)       | 37 (34.75-38.5)       | 41 (40-45)           | 44 (37-44)         | 0.0549                      | KW               |
| LTOT, n (%)             | 1 (50)           | 0 (0)            | 1 (13)                 | 1 (20)                | 0 (0)                | 0 (0)              | 0.5751                      | Chi <sup>2</sup> |

|                                 |               |           |           |                     |                     |        |                  |
|---------------------------------|---------------|-----------|-----------|---------------------|---------------------|--------|------------------|
| 6 MWD (meters)                  | 215 (120-310) | 600, n: 1 | 480, n: 1 | 360 (270-450), n: 4 | 420 (360-480), n: 2 | 0.1853 | KW               |
| VO <sub>2</sub> max (ml/kg/min) |               | 18, n: 1  |           | 14 (12-25), n: 3    | 22 (19-28)          | 0.3679 | KW               |
| Finger Clubbing, n (%)          | 1 (50)        | 1 (50)    | 1 (12.5)  | 0 (0)               | 1 (33.3)            | 0.5291 | Chi <sup>2</sup> |
| Velcro rales, n (%)             | 1 (50)        | 0 (0)     | 0 (0)     | 1 (20)              | 1 (33.3)            | 0.4574 | Chi <sup>2</sup> |
| NSAID, n (%)                    | 0 (0)         | 1 (50)    | 3 (37.5)  | 1 (20)              | 1 (33.3)            | 0.2304 | Chi <sup>2</sup> |
| PPI, n (%)                      | 1 (50)        | 1 (50)    | 2 (25)    | 2 (40)              | 2 (66.6)            | 0.7738 | Chi <sup>2</sup> |
| Systemic steroids               | 1 (50)        | 1 (50)    | 7 (87.5)  | 3 (60)              | 2 (66.6)            | 0.6133 | Chi <sup>2</sup> |

Abbreviations: Comparison of clinical and functional parameters for the ILD patient collective. The data are given in median (interquartile range), numbers or percentage (n, %). Calculation of p values was performed with use of Kruskal-Wallis Test (KWU), Dunnett's multiple comparison tests and One-way Anova; Chi<sup>2</sup>-Test (Chi<sup>2</sup>) for nominal variables, and Mann-Whitney-U (MWU) Test for BAL. If data was not available from all patients, the number (s) is specified.

**Supplementary Table S2.** Demographics, clinical and lung function parameters in patient cohorts underlying measurements in BALF.

|                      | Healthy controls<br>n = 20 | IPF<br>n = 21            | ILD<br>n = 31            | Pooled analysis,<br>p-value | Test             |
|----------------------|----------------------------|--------------------------|--------------------------|-----------------------------|------------------|
| Age                  | 30 (25-58)                 | 60 (55-65) **            | 55 (43-67)               | 0.0027                      | KW               |
| Gender (♀/♂)         | 11/9                       | 6/15                     | 17/14                    | 0.1263                      | Chi <sup>2</sup> |
| Active smoker, n (%) | 1 (5)                      | 1 (1)                    | 1 (8)                    |                             |                  |
| Never smoked, n (%)  | 1 (5)                      | 2 (9.5)                  | 12 (39)                  | 0.7711                      | Chi <sup>2</sup> |
| Ex-smoker, n (%)     | 3 (15)                     | 12 (57)                  | 10 (32)                  |                             |                  |
| LDH (U/l)            | 157 (125-195), n: 11       | 245 (203-313), n: 20 *** | 238 (186-298), n: 29 *** | 0.0001                      | KW               |
| CK (U/l)             | 78 (65-96), n: 8           | 74 (49-98)               | 77 (51-118), n: 26       | 0.9146                      | KW               |
| CRP (mg/dl)          | 2.5 (0.8-4), n: 8          | 2 (1.3-6.6)              | 4 (1.6-6)                | 0.3312                      | KW               |
| BAL: (ml)            | 98 (87-104), n: 8          | 100 (80-110)             | 98 (80-113)              | 0.9322                      | KW               |
| Macrophages %        | 89 (83-94), n: 8           | 84 (69-90)               | 65 (41-82) **            | 0.0031                      | KW               |
| Neutrophils %        | 3.5 (1-5), n: 8            | 5 (2.5-9.5)              | 4 (2-19)                 | 0.5202                      | KW               |
| Eosinophils %        | 1 (0-1), n: 8              | 3 (1-4) *                | 1 (0-2.25), n: 30        | 0.0155                      | KW               |
| Lymphocytes %        | 5.5 (4.25-12), n: 8        | 6 (2.5-14.5)             | 19 (6-36) *              | 0.0133                      | KW               |
| CD4/CD8 ratio        | 4.3, n: 1                  | 2.3 (1.4-4.6), n: 11     | 4.8 (0.9-9), n: 23       | 0.4706                      | KW               |
| VC % pred.           | 95 (91-116), n: 8          | 64 (54-72), n: 20 **     | 71 (55-92) **            | 0.0035                      | KW               |
| FVC % pred.          | 97 (84-119), n: 6          | 67 (53-75)               | 70 (56-94), n: 30        | 0.014                       | KW               |
| TLC % pred.          | 103 (95-126), n: 8         | 69 (56-82), n: 20 ***    | 89 (71-105) ***          | 0.0001                      | KW               |
| FEV1 % pred.         | 98 (89-109), n: 8          | 71 (55-77), n: 20 **     | 74 (59-87) **            | 0.003                       | KW               |

|                                 |                     |                        |                         |          |                  |
|---------------------------------|---------------------|------------------------|-------------------------|----------|------------------|
| FEV1/VC % pred.                 | 107 (97-112), n: 8  | 110 (102-118), n: 20   | 104 (98-110), n: 30     | 0.2606   | KW               |
| ITGV % pred.                    | 104 (88-129), n: 6  | 67 (55-87), n: 20 **   | 85 (72-108)             | 0.0015   | KW               |
| RV % pred.                      | 139 (110-148), n: 8 | 75 (66-100), n: 20 *** | 111 (92-148)            | < 0.0001 | KW               |
| RV/TLC % pred.                  | 117 (97-137), n: 6  | 110 (98-122), n: 20 *  | 133 (109-146), n: 30 *  | 0.0293   | KW               |
| R tot kPa x s/l                 | 88 (80-103), n: 8   | 86 (69-100) **         | 110 (93-133)            | 0.01     | KW               |
| DLCO % pred.                    | 69 (63-75), n: 2    | 43 (34-52), n: 19 **   | 55 (44-83), n: 27       | 0.01     | KW               |
| KCO % pred.                     | 77, n:1             | 65 (59-81), n: 20      | 82 (61-97), n: 26       | 0.3105   | KW               |
| SaO <sub>2</sub> in %           | 95 (95-95), n: 3    | 94 (93-96), n: 20      | 94 (92-95), n: 30       | 0.6495   | KW               |
| pO <sub>2</sub> (mmHg)          | 77 (72-92), n: 5    | 70 (66-74), n: 19      | 67 (60-75), n: 26       | 0.0489   | KW               |
| pCO <sub>2</sub> (mmHg)         | 37 (34-41), n: 5    | 38 (36-41), n: 19      | 38 (35-41), n: 26       | 0.7014   | KW               |
| LTOT, n (%)                     | 0 (0)               | 4 (20)                 | 6 (19) ***              | 0.0003   | Chi <sup>2</sup> |
| 6 MWD (meters)                  |                     | 405 (352-477)          | 406 (314-454), n: 26    | 0.6377   | MWU              |
| VO <sub>2</sub> max (ml/kg/min) |                     | 13.7 (12.2-18), n: 15  | 16.4 (13.4-20.4), n: 21 | 0.2414   | MWU              |
| NYHA Grade I-IV                 |                     | 3 (2-3), n: 15         | 2 (2-3), n: 15          | 0.1551   | MWU              |
| BORG Score in 6 MWD             |                     | 3 (2-6), n: 19*        | 1 (1-3), n: 25          | 0.04     | MWU              |
| Digital Clubbing, n (%)         | 0 (0)               | 10 (14)***             | 4 (31)                  | 0.0003   | Chi <sup>2</sup> |
| Velcro rales, n (%)             | 0 (0)               | 17 (24) ***            | 17 (55)***              | < 0.0001 | Chi <sup>2</sup> |
| NSAID, n (%)                    | 0 (0)               | 4 (19)                 | 8 (26)                  | 0.051    | Chi <sup>2</sup> |
| PPI, n (%)                      | 2 (10)              | 3 (14)                 | 11 (35)                 | 0.0594   | Chi <sup>2</sup> |
| Systemic steroids, n(%)         | 0 (0)               | 7 (33)                 | 8 (26) *                | 0.0211   | Chi <sup>2</sup> |

Abbreviations: The data are given in median (interquartile range), numbers or percentage (n, %). The NSIP, HP and sarcoidosis are grouped together as ILDs. If data was not available from all patients, the number (s) is specified. Calculation of p values was performed with use of Kruskal-Wallis Test (KW), Dunnett's multiple comparison tests and One-way Anova; Chi<sup>2</sup>-Test (Chi<sup>2</sup>) for nominal variables, and Mann-Whitney-U Test (MWU). \* - p < 0.05, \*\* - p < 0.01, \*\*\* - p < 0.0001.
